# Supplementary material for: Impact of obstetric interventions on condition at birth in extremely preterm babies: evidence from a national cohort study
Source: Springer Nature journal article supplement (doi:10.1186/s12884-016-1154-y), 2016-12-01
Supplement: MOESM1 [file 11931134]

RESEARCH

# Additional file 1: Supplementary figures

Andrei S Morgan<sup>1\*</sup>, Neil Marlow<sup>1</sup>, Elizabeth S Draper<sup>3</sup>, Zarko Alfirević<sup>4</sup>, Enid M Hennessy<sup>5</sup> and Kate Costeloe<sup>2</sup>

\*Correspondence: [andrei.morgan@ucl.ac.uk](mailto:andrei.morgan@ucl.ac.uk)  
<sup>1</sup>Institute for Womens' Health, UCL, 74 Huntley Street, WC1E 6AU, London, UK  
 Full list of author information is available at the end of the article

**Supplementary figure 1 — Inclusion numbers for the obstetric antecedents analysis**

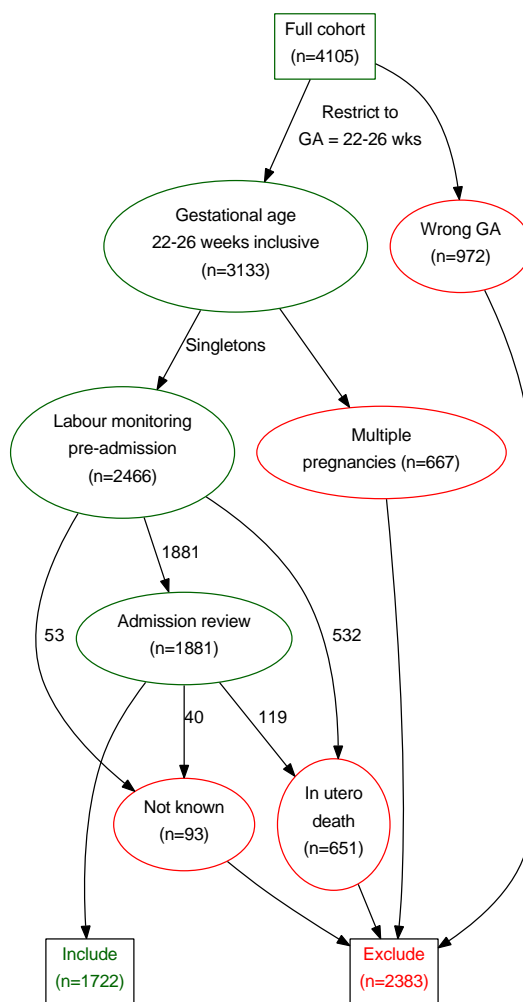

Flow diagram showing inclusion and exclusion numbers for participant mother-baby pairs from the EPICure 2 cohort of babies born between 22 and 26 completed weeks gestation in England in 2006. GA: gestational age.

### Supplementary figure 2 — Counselling factors assessed in the obstetric antecedents analysis

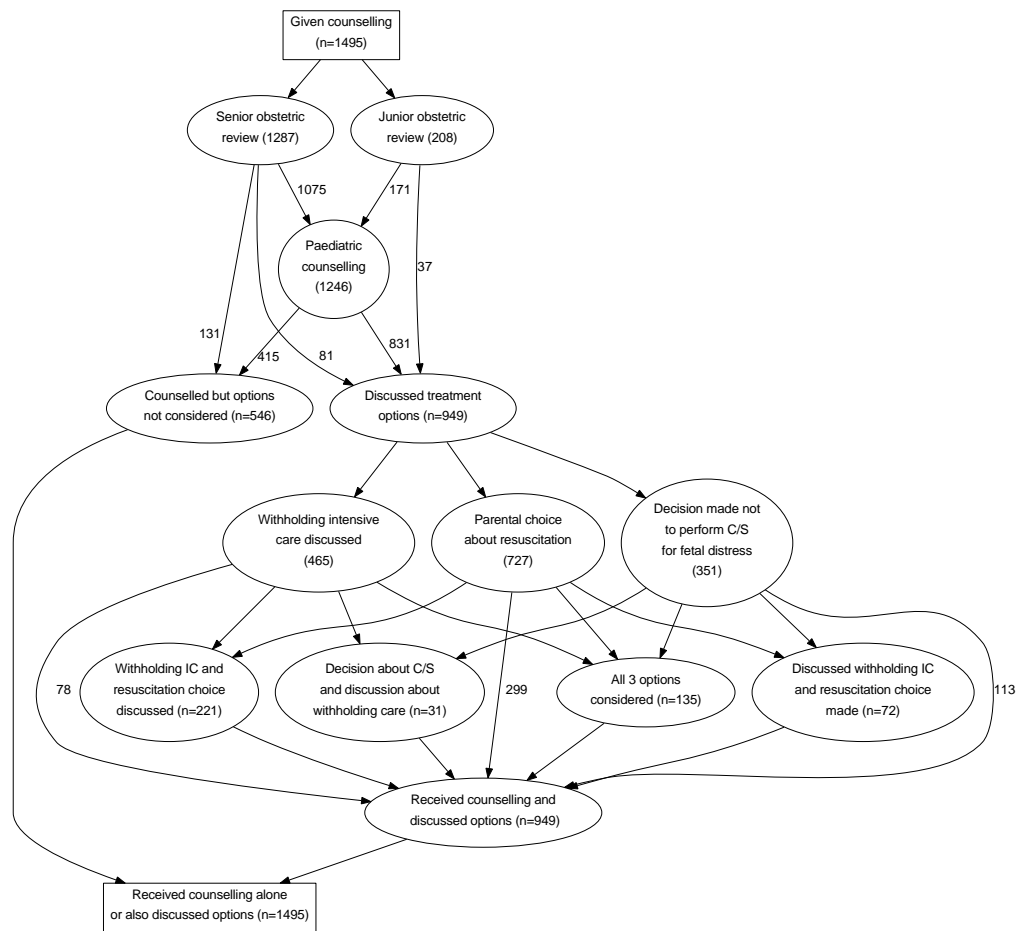

Flow diagram showing detail about counselling factors measured in the EPICure 2 cohort of babies born between 22 and 26 completed weeks gestation in England in 2006.

**Supplementary figure 3 — Clinical factors assessed in the obstetric antecedents analysis**

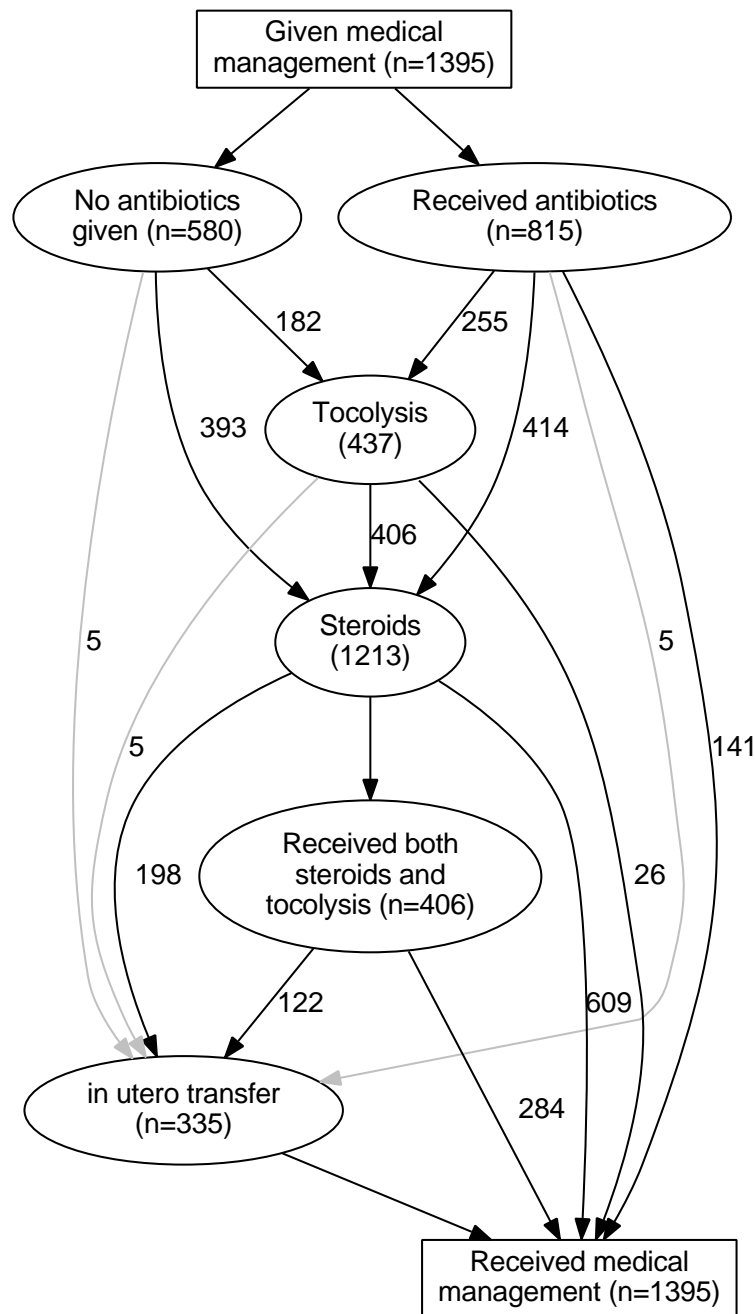

Flow diagram showing detail about clinical factors measured in the EPICure 2 cohort of babies born between 22 and 26 completed weeks gestation in England in 2006.

**Supplementary figure 4 — Delivery information available for the obstetric antecedents analysis**

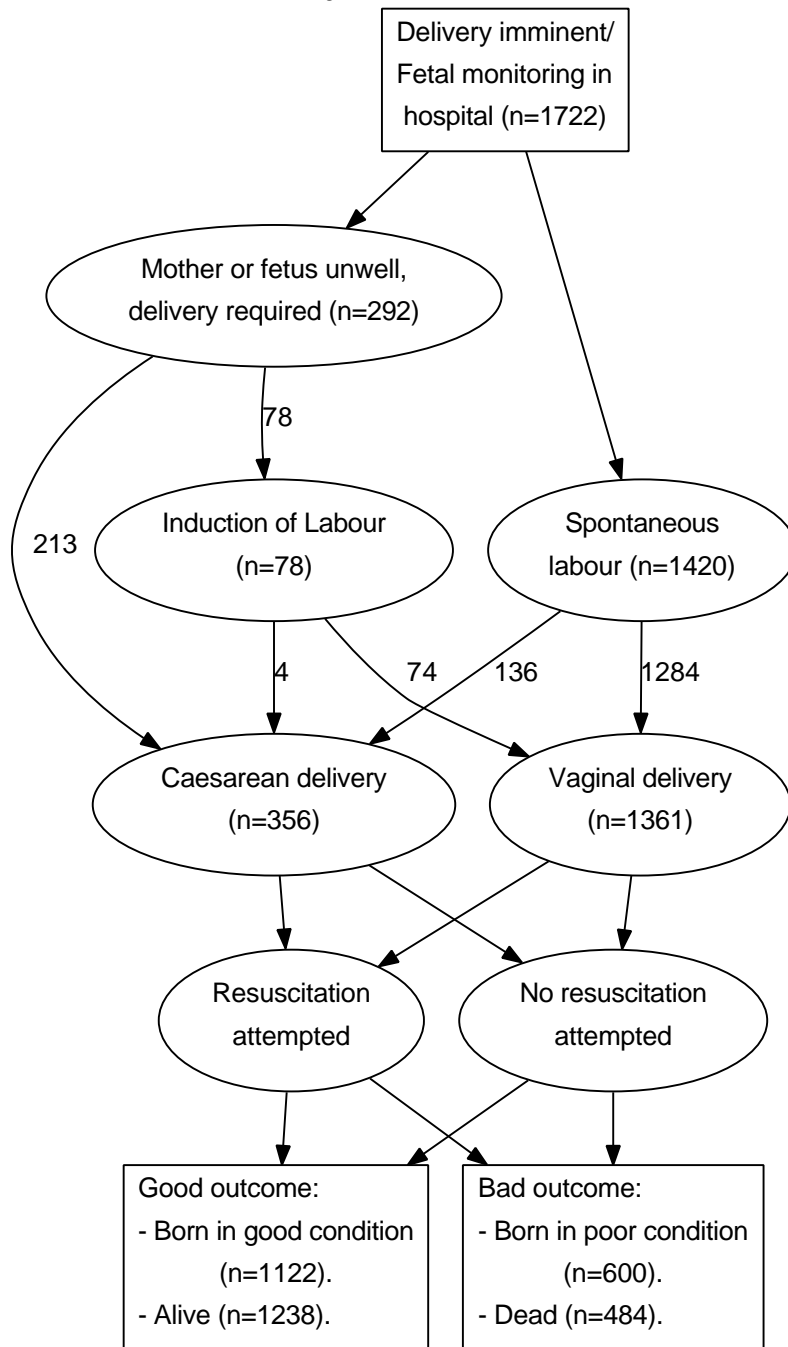

Flow diagram showing detail about delivery measured in the EPICure 2 cohort of babies born between 22 and 26 completed weeks gestation in England in 2006. Not all numbers add to 1,722 due to missing data in some of the variables.

**Author details**

<sup>1</sup>Institute for Womens' Health, UCL, 74 Huntley Street, WC1E 6AU, London, UK. <sup>2</sup> Homerton Hospital, London, UK. <sup>3</sup> University of Leicester, Leicester, UK. <sup>4</sup> University of Liverpool, Liverpool, UK. <sup>5</sup> The Wolfson Institute, Queen Mary University of London, London, UK.

**References**
