# Supplementary material for: Impact of obstetric interventions on condition at birth in extremely preterm babies: evidence from a national cohort study
Source: Springer Nature journal article supplement (doi:10.1186/s12884-016-1154-y), 2016-12-01
Supplement: MOESM2 [file 11931134]

RESEARCH

## Additional file 2: Supplementary tables

Andrei S Morgan<sup>1\*</sup>, Neil Marlow<sup>1</sup>, Elizabeth S Draper<sup>3</sup>, Zarko Alfirević<sup>4</sup>, Enid M Hennessy<sup>5</sup> and Kate Costeloe<sup>2</sup>

---

\*Correspondence:

[andrei.morgan@ucl.ac.uk](mailto:andrei.morgan@ucl.ac.uk)

<sup>1</sup>Institute for Womens' Health,  
UCL, 74 Huntley Street, WC1E  
6AU, London, UK

Full list of author information is  
available at the end of the article

### **Supplementary table 1 — Descriptive statistics from the obstetric antecedents investigation**

This table is shown on the following pages in landscape format.

Table S1: Descriptive statistics of explanatory variables in relation to presence of a heart rate greater than 100 at five minutes of age (“good condition”) or to death during labour or in the delivery room (“delivery room death”) in the complete population of babies born at 22-26 completed weeks of gestation in England in 2006 who were known to be alive at admission to hospital and at the start of labour monitoring or decision to perform Caesarean section.

| Variable (Levels)                                   | N    | (%)  | Born in good condition | (HR %) | OR   | (95% CI)      | P-value | Peri-natal death | (%)  | OR     | (95% CI)          | P-value |
|-----------------------------------------------------|------|------|------------------------|--------|------|---------------|---------|------------------|------|--------|-------------------|---------|
| Antenatal steroid course <sup>a</sup> <i>N=1701</i> |      |      |                        |        |      |               |         |                  |      |        |                   |         |
| none                                                | 488  | 28.3 | 172                    | 35.2   | 1.00 | (—)           | —       | 301              | 61.7 | 1.00   | —                 | (—)     |
| partial                                             | 452  | 26.2 | 332                    | 73.5   | 5.08 | (3.84 – 6.72) | < 0.001 | 79               | 17.5 | 0.13   | (0.10 – 0.18)     | < 0.001 |
| full                                                | 761  | 44.2 | 607                    | 79.8   | 7.24 | (5.60 – 9.36) | < 0.001 | 99               | 13.0 | 0.09   | (0.07 – 0.12)     | < 0.001 |
| Tocolysis <i>N=1720</i>                             |      |      |                        |        |      |               |         |                  |      |        |                   |         |
| no                                                  | 1283 | 74.5 | 782                    | 61.0   | 1.00 | (—)           | —       | 423              | 33.0 | 1.00   | (—)               | —       |
| yes                                                 | 437  | 25.4 | 340                    | 77.8   | 2.25 | (1.75 – 2.89) | < 0.001 | 61               | 14.0 | 0.33   | (0.25 – 0.44)     | < 0.001 |
| Delivery by Caesarean <i>N=1717</i>                 |      |      |                        |        |      |               |         |                  |      |        |                   |         |
| no                                                  | 1361 | 79.0 | 814                    | 59.8   | 1.00 | —             | (—)     | 456              | 33.5 | 1.00   | —                 | (—)     |
| yes                                                 | 356  | 20.7 | 307                    | 86.2   | 4.21 | (3.06 – 5.80) | < 0.001 | 27               | 7.6  | 0.16   | (0.11 – 0.24)     | < 0.001 |
| Gestational age (weeks) <i>N=1722</i>               |      |      |                        |        |      |               |         |                  |      |        |                   |         |
| 22                                                  | 204  | 11.8 | 22                     | 10.8   | 0.02 | (0.01 – 0.03) | < 0.001 | 190              | 93.1 | 297.14 | (145.89 – 605.20) | < 0.001 |
| 23                                                  | 281  | 16.3 | 127                    | 45.2   | 0.12 | (0.09 – 0.18) | < 0.001 | 141              | 50.2 | 22.05  | (13.16 – 36.94)   | < 0.001 |
| 24                                                  | 366  | 21.3 | 243                    | 66.4   | 0.30 | (0.21 – 0.42) | < 0.001 | 89               | 24.3 | 7.03   | (4.19 – 11.81)    | < 0.001 |
| 25                                                  | 436  | 25.3 | 352                    | 80.7   | 0.63 | (0.44 – 0.91) | 0.02    | 45               | 10.3 | 2.52   | (1.45 – 4.38)     | < 0.001 |
| 26                                                  | 435  | 25.3 | 378                    | 86.9   | 1.00 | (—)           | —       | 19               | 4.4  | 1.00   | (—)               | —       |
| Fetal sex <i>N=1719</i>                             |      |      |                        |        |      |               |         |                  |      |        |                   |         |
| Female                                              | 804  | 46.7 | 549                    | 68.3   | 1.00 | (—)           | —       | 201              | 25.0 | 1.00   | (—)               | —       |
| Male                                                | 915  | 53.1 | 572                    | 62.5   | 0.77 | (0.63 – 0.95) | 0.01    | 280              | 30.6 | 1.32   | (1.07 – 1.64)     | 0.01    |
| Ethnicity <i>N=1722</i>                             |      |      |                        |        |      |               |         |                  |      |        |                   |         |
| White                                               | 1118 | 64.9 | 725                    | 64.8   | 1.00 | (—)           | —       | 312              | 27.9 | 1.00   | (—)               | —       |
| Black                                               | 334  | 19.4 | 225                    | 67.4   | 1.12 | (0.86 – 1.45) | 0.43    | 96               | 28.7 | 1.04   | (0.79 – 1.37)     | 0.82    |
| Indian                                              | 183  | 10.6 | 114                    | 62.3   | 0.90 | (0.65 – 1.24) | 0.56    | 53               | 29.0 | 1.05   | (0.75 – 1.49)     | 0.84    |
| Other                                               | 87   | 5.1  | 58                     | 66.7   | 1.08 | (0.68 – 1.72) | 0.82    | 23               | 26.4 | 0.93   | (0.57 – 1.52)     | 0.86    |
| Maternal age (categories) <i>N=1718</i>             |      |      |                        |        |      |               |         |                  |      |        |                   |         |
| <20 years                                           | 157  | 9.1  | 98                     | 62.4   | 1.00 | (—)           | —       | 50               | 31.8 | 1.00   | (—)               | —       |
| 20-24 years                                         | 344  | 20.0 | 214                    | 62.2   | 0.99 | (0.67 – 1.46) | 1.00    | 96               | 27.9 | 0.83   | (0.55 – 1.25)     | 0.43    |
| 25-29 years                                         | 467  | 27.1 | 305                    | 65.3   | 1.13 | (0.78 – 1.65) | 0.58    | 129              | 27.6 | 0.82   | (0.55 – 1.21)     | 0.36    |
| 30-34 years                                         | 388  | 22.5 | 253                    | 65.2   | 1.13 | (0.77 – 1.66) | 0.61    | 116              | 29.9 | 0.91   | (0.61 – 1.36)     | 0.73    |

Continued on next page...

Table S1: (Continued) Descriptive statistics of explanatory variables in relation to condition at birth or to delivery room death in the complete population of babies born at 22-26 completed weeks of gestation in England in 2006 who were known to be alive at admission to hospital and at the start of labour monitoring or decision to perform Caesarean section.

| Variable (Levels)                               | N             | (%)  | Born in good condition | (HR %) | OR   | (95% CI)      | P-value | Peri-natal death | (%)  | OR   | (95% CI)      | P-value |
|-------------------------------------------------|---------------|------|------------------------|--------|------|---------------|---------|------------------|------|------|---------------|---------|
| 35-39 years                                     | 278           | 16.1 | 193                    | 69.4   | 1.37 | (0.91 – 2.06) | 0.17    | 73               | 26.3 | 0.76 | (0.50 – 1.17) | 0.26    |
| >40 years                                       | 84            | 4.9  | 58                     | 69.0   | 1.34 | (0.76 – 2.36) | 0.38    | 19               | 22.6 | 0.63 | (0.34 – 1.15) | 0.17    |
| Gestational age at booking                      | <i>N=1551</i> |      |                        |        |      |               |         |                  |      |      |               |         |
| <10 weeks                                       | 463           | 26.9 | 295                    | 63.7   | 1.00 | (—)           | —       | 136              | 29.4 | 1.00 | (—)           | —       |
| 10-12 weeks                                     | 487           | 28.3 | 314                    | 64.5   | 1.03 | (0.79 – 1.35) | 0.86    | 142              | 29.2 | 0.99 | (0.75 – 1.31) | 1.00    |
| 13-19 weeks                                     | 487           | 28.3 | 320                    | 65.7   | 1.09 | (0.84 – 1.42) | 0.57    | 137              | 28.1 | 0.94 | (0.71 – 1.25) | 0.73    |
| 20+ weeks                                       | 114           | 6.6  | 80                     | 70.2   | 1.34 | (0.86 – 2.09) | 0.24    | 26               | 22.8 | 0.71 | (0.44 – 1.15) | 0.20    |
| Maternal smoking                                | <i>N=1722</i> |      |                        |        |      |               |         |                  |      |      |               |         |
| no                                              | 1303          | 75.7 | 851                    | 65.3   | 1.00 | (—)           | —       | 365              | 28.0 | 1.00 | (—)           | —       |
| yes                                             | 419           | 24.3 | 271                    | 64.7   | 0.97 | (0.77 – 1.22) | 0.86    | 119              | 28.4 | 1.02 | (0.80 – 1.30) | 0.93    |
| Maternal body mass index (BMI)                  | <i>N=1481</i> |      |                        |        |      |               |         |                  |      |      |               |         |
| <18.5 (underweight)                             | 56            | 3.3  | 31                     | 55.4   | 1.00 | (—)           | —       | 17               | 30.4 | 1.00 | (—)           | —       |
| 18.5-24.9 (appropriate)                         | 658           | 38.2 | 421                    | 64.0   | 1.43 | (0.83 – 2.48) | 0.25    | 189              | 28.7 | 0.92 | (0.51 – 1.67) | 0.92    |
| >=25 (overweight)                               | 767           | 44.5 | 497                    | 64.8   | 1.48 | (0.86 – 2.57) | 0.2     | 227              | 29.6 | 0.96 | (0.53 – 1.74) | 1.00    |
| Pre-pregnancy diabetes, type I or II            | <i>N=1709</i> |      |                        |        |      |               |         |                  |      |      |               |         |
| no/miss                                         | 1690          | 98.1 | 1104                   | 65.3   | 1.00 | (—)           | —       | 476              | 28.2 | 1.00 | (—)           | —       |
| yes                                             | 19            | 1.1  | 14                     | 73.7   | 1.49 | (0.53 – 4.15) | 0.60    | 3                | 15.8 | 0.48 | (0.14 – 1.65) | 0.35    |
| Non-insulin dependent gestational diabetes      | <i>N=1709</i> |      |                        |        |      |               |         |                  |      |      |               |         |
| no/miss                                         | 1702          | 98.8 | 1114                   | 65.5   | 1.00 | (—)           | —       | 477              | 28.0 | 1.00 | (—)           | —       |
| yes                                             | 7             | 0.4  | 4                      | 57.1   | 0.70 | (0.16 – 3.15) | 0.95    | 2                | 28.6 | 1.03 | (0.2 – 5.31)  | 1.00    |
| Essential hypertension, on treatment at booking | <i>N=1709</i> |      |                        |        |      |               |         |                  |      |      |               |         |
| no/miss                                         | 1656          | 96.2 | 1080                   | 65.2   | 1.00 | (—)           | —       | 467              | 28.2 | 1.00 | (—)           | —       |
| yes                                             | 53            | 3.1  | 38                     | 71.7   | 1.35 | (0.74 – 2.48) | 0.41    | 12               | 22.6 | 0.75 | (0.39 – 1.43) | 0.46    |
| Epilepsy                                        | <i>N=1709</i> |      |                        |        |      |               |         |                  |      |      |               |         |
| no/miss                                         | 1697          | 98.5 | 1110                   | 65.4   | 1.00 | (—)           | —       | 476              | 28.0 | 1.00 | (—)           | —       |
| yes                                             | 12            | 0.7  | 8                      | 66.7   | 1.06 | (0.32 – 3.53) | 1.00    | 3                | 25.0 | 0.86 | (0.23 – 3.17) | 1.00    |
| Other important medical history                 | <i>N=1709</i> |      |                        |        |      |               |         |                  |      |      |               |         |
| no/miss                                         | 1694          | 98.4 | 1107                   | 65.3   | 1.00 | (—)           | —       | 477              | 28.2 | 1.00 | (—)           | —       |
| yes                                             | 15            | 0.9  | 11                     | 73.3   | 1.46 | (0.46 – 4.60) | 0.71    | 2                | 13.3 | 0.39 | (0.09 – 1.75) | 0.33    |
| Any maternal medical problems                   | <i>N=1711</i> |      |                        |        |      |               |         |                  |      |      |               |         |
| no                                              | 1610          | 93.5 | 1046                   | 65.0   | 1.00 | (—)           | —       | 458              | 28.4 | 1.00 | (—)           | —       |
| yes                                             | 101           | 5.9  | 72                     | 71.3   | 1.34 | (0.86 – 2.08) | 0.24    | 21               | 20.8 | 0.66 | (0.40 – 1.08) | 0.12    |
| Parity (categorical)                            | <i>N=774</i>  |      |                        |        |      |               |         |                  |      |      |               |         |
| Primip                                          | 365           | 21.2 | 244                    | 66.8   | 1.00 | (—)           | —       | 98               | 26.8 | 1.00 | (—)           | —       |

Continued on next page...

Table S1: (Continued) Descriptive statistics of explanatory variables in relation to condition at birth or to delivery room death in the complete population of babies born at 22-26 completed weeks of gestation in England in 2006 who were known to be alive at admission to hospital and at the start of labour monitoring or decision to perform Caesarean section.

| Variable (Levels)                     | N             | (%)  | Born<br>in good<br>condition | (HR %) | OR   | (95% CI)      | P-value | Peri-<br>natal<br>death | (%)  | OR   | (95% CI)      | P-value |
|---------------------------------------|---------------|------|------------------------------|--------|------|---------------|---------|-------------------------|------|------|---------------|---------|
| G1                                    | 344           | 20.0 | 215                          | 62.5   | 0.83 | (0.61 – 1.13) | 0.26    | 90                      | 26.2 | 0.97 | (0.69 – 1.35) | 0.9     |
| 2+ prev. babies                       | 65            | 3.8  | 45                           | 69.2   | 1.12 | (0.63 – 1.97) | 0.82    | 16                      | 24.6 | 0.89 | (0.48 – 1.64) | 0.82    |
| Primiparous (first registrable birth) | <i>N=1701</i> |      |                              |        |      |               |         |                         |      |      |               |         |
| no                                    | 858           | 49.8 | 560                          | 65.3   | 1.00 | (—)           | —       | 228                     | 26.6 | 1.00 | (—)           | —       |
| yes                                   | 843           | 49.0 | 554                          | 65.7   | 1.02 | (0.84 – 1.25) | 0.89    | 246                     | 29.2 | 1.14 | (0.92 – 1.41) | 0.25    |
| Primigravid (first pregnancy)         | <i>N=1712</i> |      |                              |        |      |               |         |                         |      |      |               |         |
| No                                    | 1180          | 68.5 | 765                          | 64.8   | 1.00 | (—)           | —       | 334                     | 28.3 | 1.00 | (—)           | —       |
| Yes                                   | 532           | 30.9 | 353                          | 66.4   | 1.07 | (0.86 – 1.33) | 0.58    | 146                     | 27.4 | 0.96 | (0.76 – 1.2)  | 0.76    |
| Previous Caesarean                    | <i>N=1677</i> |      |                              |        |      |               |         |                         |      |      |               |         |
| no                                    | 1445          | 83.9 | 951                          | 65.8   | 1.00 | (—)           | —       | 402                     | 27.8 | 1.00 | (—)           | —       |
| yes                                   | 232           | 13.5 | 154                          | 66.4   | 1.03 | (0.76 – 1.38) | 0.92    | 58                      | 25.0 | 0.86 | (0.63 – 1.19) | 0.42    |
| Previous premature birth              | <i>N=1687</i> |      |                              |        |      |               |         |                         |      |      |               |         |
| no                                    | 1420          | 82.5 | 941                          | 66.3   | 1.00 | (—)           | —       | 395                     | 27.8 | 1.00 | (—)           | —       |
| yes                                   | 267           | 15.5 | 168                          | 62.9   | 0.86 | (0.66 – 1.13) | 0.32    | 71                      | 26.6 | 0.94 | (0.70 – 1.26) | 0.74    |
| IMD national quintiles                | <i>N=1700</i> |      |                              |        |      |               |         |                         |      |      |               |         |
| Least                                 | 615           | 35.7 | 392                          | 63.7   | 1.00 | (—)           | —       | 189                     | 30.7 | 1.00 | (—)           | —       |
| 2                                     | 582           | 33.8 | 378                          | 64.9   | 1.05 | (0.83 – 1.34) | 0.71    | 169                     | 29.0 | 0.92 | (0.72 – 1.18) | 0.56    |
| 3                                     | 389           | 22.6 | 261                          | 67.1   | 1.16 | (0.89 – 1.52) | 0.31    | 101                     | 26.0 | 0.79 | (0.59 – 1.05) | 0.12    |
| 4                                     | 112           | 6.5  | 75                           | 67.0   | 1.15 | (0.75 – 1.77) | 0.58    | 21                      | 18.8 | 0.52 | (0.31 – 0.86) | 0.01    |
| Most                                  | 2             | 0.1  | 2                            | 100.0  | ∞    | (0.00 – ∞)    | 0.74    | 0                       | 0.0  | 0.00 | (0.00 – ∞)    | 0.86    |
| IMD study quintiles                   | <i>N=1700</i> |      |                              |        |      |               |         |                         |      |      |               |         |
| Least                                 | 532           | 30.9 | 336                          | 63.2   | 1.00 | (—)           | —       | 163                     | 30.6 | 1.00 | (—)           | —       |
| 2                                     | 506           | 29.4 | 326                          | 64.4   | 1.06 | (0.82 – 1.36) | 0.72    | 151                     | 29.8 | 0.96 | (0.74 – 1.26) | 0.83    |
| 3                                     | 412           | 23.9 | 278                          | 67.5   | 1.21 | (0.92 – 1.59) | 0.19    | 111                     | 26.9 | 0.83 | (0.63 – 1.11) | 0.24    |
| 4                                     | 214           | 12.4 | 146                          | 68.2   | 1.25 | (0.89 – 1.76) | 0.22    | 49                      | 22.9 | 0.67 | (0.47 – 0.97) | 0.04    |
| Most                                  | 36            | 2.1  | 22                           | 61.1   | 0.92 | (0.46 – 1.83) | 0.95    | 6                       | 16.7 | 0.45 | (0.18 – 1.11) | 0.11    |
| Any counselling                       | <i>N=1722</i> |      |                              |        |      |               |         |                         |      |      |               |         |
| No                                    | 227           | 13.2 | 132                          | 58.1   | 1.00 | (—)           | —       | 67                      | 29.5 | 1.00 | (—)           | —       |
| Yes                                   | 1495          | 86.8 | 990                          | 66.2   | 1.41 | (1.06 – 1.88) | 0.02    | 417                     | 27.9 | 0.92 | (0.68 – 1.26) | 0.67    |
| Were any options discussed            | <i>N=1722</i> |      |                              |        |      |               |         |                         |      |      |               |         |
| No                                    | 773           | 44.9 | 558                          | 72.2   | 1.00 | (—)           | —       | 149                     | 19.3 | 1.00 | (—)           | —       |
| Yes                                   | 949           | 55.1 | 564                          | 59.4   | 0.56 | (0.46 – 0.69) | < 0.001 | 335                     | 35.3 | 2.28 | (1.83 – 2.86) | < 0.001 |
| Paediatric counselling                | <i>N=1633</i> |      |                              |        |      |               |         |                         |      |      |               |         |
| no                                    | 387           | 22.5 | 216                          | 55.8   | 1.00 | (—)           | —       | 136                     | 35.1 | 1.00 | (—)           | —       |

Continued on next page...

Table S1: (Continued) Descriptive statistics of explanatory variables in relation to condition at birth or to delivery room death in the complete population of babies born at 22-26 completed weeks of gestation in England in 2006 who were known to be alive at admission to hospital and at the start of labour monitoring or decision to perform Caesarean section.

| Variable (Levels)                              | N             | (%)  | Born<br>in good<br>condition | (HR %) | OR   | (95% CI)      | P-value | Peri-<br>natal<br>death | (%)  | OR    | (95% CI)         | P-value |
|------------------------------------------------|---------------|------|------------------------------|--------|------|---------------|---------|-------------------------|------|-------|------------------|---------|
| yes                                            | 1246          | 72.4 | 846                          | 67.9   | 1.67 | (1.33 – 2.11) | < 0.001 | 326                     | 26.2 | 0.65  | (0.51 – 0.83)    | < 0.001 |
| Choice made about newborn care (resus/IC)      | <i>N=1235</i> |      |                              |        |      |               |         |                         |      |       |                  |         |
| none expressed                                 | 508           | 29.5 | 336                          | 66.1   | 1.00 | (—)           | —       | 131                     | 25.8 | 1.00  | (—)              | —       |
| full NIC                                       | 391           | 22.7 | 309                          | 79.0   | 1.93 | (1.42 – 2.62) | < 0.001 | 44                      | 11.3 | 0.36  | (0.25 – 0.53)    | < 0.001 |
| withhold IC                                    | 45            | 2.6  | 5                            | 11.1   | 0.06 | (0.02 – 0.17) | < 0.001 | 43                      | 95.6 | 61.87 | (14.78 – 258.98) | < 0.001 |
| paed discretion                                | 291           | 16.9 | 139                          | 47.8   | 0.47 | (0.35 – 0.63) | < 0.001 | 140                     | 48.1 | 2.67  | (1.97 – 3.62)    | < 0.001 |
| Decision not to perform C/S for fetal distress | <i>N=1158</i> |      |                              |        |      |               |         |                         |      |       |                  |         |
| No                                             | 807           | 46.9 | 578                          | 71.6   | 1.00 | (—)           | —       | 169                     | 20.9 | 1.00  | (—)              | —       |
| Yes                                            | 351           | 20.4 | 175                          | 49.9   | 0.39 | (0.30 – 0.51) | < 0.001 | 158                     | 45.0 | 3.09  | (2.36 – 4.05)    | < 0.001 |
| Withholding care discussed                     | <i>N=1178</i> |      |                              |        |      |               |         |                         |      |       |                  |         |
| No                                             | 713           | 41.4 | 539                          | 75.6   | 1.00 | (—)           | —       | 106                     | 14.9 | 1.00  | (—)              | —       |
| Yes                                            | 465           | 27.0 | 218                          | 46.9   | 0.28 | (0.22 – 0.37) | < 0.001 | 239                     | 51.4 | 6.06  | (4.60 – 7.97)    | < 0.001 |
| Senior obstetric counselling                   | <i>N=1722</i> |      |                              |        |      |               |         |                         |      |       |                  |         |
| No                                             | 435           | 25.3 | 270                          | 62.1   | 1.00 | (—)           | —       | 120                     | 27.6 | 1.00  | (—)              | —       |
| Yes                                            | 1287          | 74.7 | 852                          | 66.2   | 1.2  | (0.96 – 1.50) | 0.13    | 364                     | 28.3 | 1.04  | (0.81 – 1.32)    | 0.83    |
| PROM >24 hrs                                   | <i>N=1710</i> |      |                              |        |      |               |         |                         |      |       |                  |         |
| no                                             | 1211          | 70.3 | 793                          | 65.5   | 1.00 | (—)           | —       | 344                     | 28.4 | 1.00  | (—)              | —       |
| yes                                            | 499           | 29.0 | 324                          | 64.9   | 0.98 | (0.78 – 1.21) | 0.87    | 136                     | 27.3 | 0.94  | (0.75 – 1.19)    | 0.67    |
| Abruption                                      | <i>N=1710</i> |      |                              |        |      |               |         |                         |      |       |                  |         |
| no                                             | 1577          | 91.6 | 1043                         | 66.1   | 1.00 | (—)           | —       | 428                     | 27.1 | 1.00  | (—)              | —       |
| yes                                            | 133           | 7.7  | 74                           | 55.6   | 0.64 | (0.45 – 0.92) | 0.02    | 52                      | 39.1 | 1.72  | (1.20 – 2.48)    | < 0.001 |
| APH >20 weeks                                  | <i>N=1710</i> |      |                              |        |      |               |         |                         |      |       |                  |         |
| no                                             | 1406          | 81.6 | 916                          | 65.1   | 1.00 | (—)           | —       | 393                     | 28   | 1.00  | (—)              | —       |
| yes                                            | 304           | 17.7 | 201                          | 66.1   | 1.04 | (0.80 – 1.36) | 0.80    | 87                      | 28.6 | 1.03  | (0.79 – 1.36)    | 0.87    |
| Pre-eclampsia                                  | <i>N=1710</i> |      |                              |        |      |               |         |                         |      |       |                  |         |
| no                                             | 1586          | 92.1 | 1014                         | 63.9   | 1.00 | (—)           | —       | 465                     | 29.3 | 1.00  | (—)              | —       |
| yes                                            | 124           | 7.2  | 103                          | 83.1   | 2.77 | (1.71 – 4.47) | < 0.001 | 15                      | 12.1 | 0.33  | (0.19 – 0.58)    | < 0.001 |
| Cervical suture                                | <i>N=1710</i> |      |                              |        |      |               |         |                         |      |       |                  |         |
| no                                             | 1613          | 93.7 | 1049                         | 65.0   | 1.00 | (—)           | —       | 460                     | 28.5 | 1.00  | (—)              | —       |
| yes                                            | 97            | 5.6  | 68                           | 70.1   | 1.26 | (0.81 – 1.97) | 0.36    | 20                      | 20.6 | 0.65  | (0.39 – 1.08)    | 0.12    |
| Obstetric complication in pregnancy            | <i>N=1712</i> |      |                              |        |      |               |         |                         |      |       |                  |         |
| no                                             | 723           | 42   | 454                          | 62.8   | 1.00 | (—)           | —       | 219                     | 30.3 | 1.00  | (—)              | —       |
| yes                                            | 989           | 57.4 | 663                          | 67.0   | 1.21 | (0.99 – 1.47) | 0.08    | 261                     | 26.4 | 0.83  | (0.67 – 1.02)    | 0.09    |

Continued on next page...

Table S1: (Continued) Descriptive statistics of explanatory variables in relation to condition at birth or to delivery room death in the complete population of babies born at 22-26 completed weeks of gestation in England in 2006 who were known to be alive at admission to hospital and at the start of labour monitoring or decision to perform Caesarean section.

| Variable (Levels)                                      | N    | (%)  | Born<br>in good<br>condition | (HR %) | OR   | (95% CI)       | P-value | Peri-<br>natal<br>death | (%)  | OR   | (95% CI)      | P-value |
|--------------------------------------------------------|------|------|------------------------------|--------|------|----------------|---------|-------------------------|------|------|---------------|---------|
| Fetal complication <i>N=1695</i>                       |      |      |                              |        |      |                |         |                         |      |      |               |         |
| none                                                   | 1545 | 89.7 | 1005                         | 65     | 1.00 | (—)            | —       | 435                     | 28.2 | 1.00 | (—)           | —       |
| iugr                                                   | 91   | 5.3  | 68                           | 74.7   | 1.59 | (0.98 – 2.58)  | 0.08    | 19                      | 20.9 | 0.67 | (0.40 – 1.13) | 0.17    |
| oligo                                                  | 38   | 2.2  | 22                           | 57.9   | 0.74 | (0.38 – 1.42)  | 0.46    | 13                      | 34.2 | 1.33 | (0.67 – 2.62) | 0.52    |
| both                                                   | 21   | 1.2  | 15                           | 71.4   | 1.34 | (0.52 – 3.48)  | 0.70    | 6                       | 28.6 | 1.02 | (0.39 – 2.65) | 1.00    |
| Chorioamnionitis - definite or suspected <i>N=1683</i> |      |      |                              |        |      |                |         |                         |      |      |               |         |
| no                                                     | 1285 | 74.6 | 836                          | 65.1   | 1.00 | (—)            | —       | 355                     | 27.6 | 1.00 | (—)           | —       |
| yes                                                    | 398  | 23.1 | 262                          | 65.8   | 1.03 | (0.82 – 1.31)  | 0.82    | 119                     | 29.9 | 1.12 | (0.87 – 1.43) | 0.41    |
| Labour type (binary) <i>N=1712</i>                     |      |      |                              |        |      |                |         |                         |      |      |               |         |
| none                                                   | 292  | 17.0 | 233                          | 79.8   | 1.00 | (—)            | —       | 48                      | 16.4 | 1.00 | (—)           | —       |
| spont                                                  | 1420 | 82.5 | 884                          | 62.3   | 0.42 | (0.31 – 0.57)  | < 0.001 | 434                     | 30.6 | 2.24 | (1.61 – 3.11) | < 0.001 |
| Tocolysis (by type) <i>N=1708</i>                      |      |      |                              |        |      |                |         |                         |      |      |               |         |
| None                                                   | 1283 | 74.5 | 782                          | 61.0   | 1.00 | (—)            | —       | 423                     | 33.0 | 1.00 | (—)           | —       |
| Atosiban                                               | 143  | 8.3  | 118                          | 82.5   | 3.02 | (1.94 – 4.72)  | < 0.001 | 14                      | 9.8  | 0.22 | (0.13 – 0.39) | < 0.001 |
| Ritodrine                                              | 7    | 0.4  | 6                            | 85.7   | 3.84 | (0.46 – 32.02) | 0.34    | 1                       | 14.3 | 0.34 | (0.04 – 2.82) | 0.52    |
| Indometacin                                            | 27   | 1.6  | 24                           | 88.9   | 5.13 | (1.54 – 17.11) | 0.01    | 2                       | 7.4  | 0.16 | (0.04 – 0.69) | 0.01    |
| Nifedipine                                             | 189  | 11   | 140                          | 74.1   | 1.83 | (1.30 – 2.58)  | < 0.001 | 33                      | 17.5 | 0.43 | (0.29 – 0.64) | < 0.001 |
| Other                                                  | 19   | 1.1  | 16                           | 84.2   | 3.42 | (0.99 – 11.79) | 0.07    | 1                       | 5.3  | 0.11 | (0.02 – 0.85) | 0.02    |
| More than one                                          | 40   | 2.3  | 31                           | 77.5   | 2.21 | (1.04 – 4.67)  | 0.05    | 6                       | 15.0 | 0.36 | (0.15 – 0.86) | 0.03    |
| Antenatal (in utero) transfer <i>N=1705</i>            |      |      |                              |        |      |                |         |                         |      |      |               |         |
| no                                                     | 1370 | 79.6 | 844                          | 61.6   | 1.00 | (—)            | —       | 434                     | 31.7 | 1.00 | (—)           | —       |
| yes                                                    | 335  | 19.5 | 276                          | 82.4   | 2.92 | (2.16 – 3.94)  | < 0.001 | 39                      | 11.6 | 0.28 | (0.20 – 0.40) | < 0.001 |
| Maternal antibiotics in labour <i>N=1696</i>           |      |      |                              |        |      |                |         |                         |      |      |               |         |
| none                                                   | 881  | 51.2 | 581                          | 65.9   | 1.00 | (—)            | —       | 248                     | 28.1 | 1.00 | (—)           | —       |
| proph                                                  | 468  | 27.2 | 309                          | 66.0   | 1.00 | (0.79 – 1.27)  | 1.00    | 122                     | 26.1 | 0.90 | (0.70 – 1.16) | 0.45    |
| treatment                                              | 347  | 20.2 | 217                          | 62.5   | 0.86 | (0.67 – 1.12)  | 0.29    | 108                     | 31.1 | 1.15 | (0.88 – 1.51) | 0.33    |
| Presentation <i>N=1643</i>                             |      |      |                              |        |      |                |         |                         |      |      |               |         |
| Cephalic                                               | 915  | 53.1 | 657                          | 71.8   | 1.00 | (—)            | —       | 199                     | 21.7 | 1.00 | (—)           | —       |
| Breech                                                 | 653  | 37.9 | 379                          | 58.0   | 0.54 | (0.44 – 0.67)  | < 0.001 | 234                     | 35.8 | 2.01 | (1.61 – 2.51) | < 0.001 |
| Other                                                  | 75   | 4.4  | 47                           | 62.7   | 0.66 | (0.40 – 1.08)  | 0.12    | 21                      | 28   | 1.40 | (0.83 – 2.37) | 0.27    |
| Unit NHS category <i>N=1693</i>                        |      |      |                              |        |      |                |         |                         |      |      |               |         |
| 1                                                      | 147  | 8.5  | 70                           | 47.6   | 0.35 | (0.25 – 0.50)  | < 0.001 | 69                      | 46.9 | 3.31 | (2.31 – 4.74) | < 0.001 |
| 2                                                      | 583  | 33.9 | 351                          | 60.2   | 0.58 | (0.47 – 0.73)  | < 0.001 | 201                     | 34.5 | 1.97 | (1.56 – 2.48) | < 0.001 |
| 3                                                      | 963  | 55.9 | 695                          | 72.2   | 1.00 | (—)            | —       | 203                     | 21.1 | 1.00 | (—)           | —       |

<sup>a</sup>Chi-squared test for trend: < 0.001 ;

<sup>b</sup>Chi-squared test for trend: 0.049 ;

<sup>c</sup>Chi-squared test for trend: 0.528 ;

<sup>d</sup>Level 1: Special Care Baby Unit; Level 2: Local Neonatal Unit; Level 3: Network Intensive Care Unit.

## Supplementary table 2 — Steroids sensitivity analysis results

Table S2: Odds ratios of the effect of partial or full course of steroids on the presence of a heart rate greater than 100 at 5 minutes of age or to delivery room death in babies at 22-26 completed weeks of gestation to the population of women who received counselling in England in 2006.

| Model                                                       | N    | Partial course<br>OR<br>(95% CI) | Full course<br>OR<br>(95% CI) | P-value |
|-------------------------------------------------------------|------|----------------------------------|-------------------------------|---------|
| <b>Condition at birth</b>                                   |      |                                  |                               |         |
| Baseline                                                    | 1484 | 5.43 (3.98 – 7.42)               | 8.32 (6.25 – 11.08)           | < 0.001 |
| Baseline + GA <sup>a</sup>                                  | 1484 | 2.05 (1.41 – 2.98)               | 2.65 (1.85 – 3.80)            | < 0.001 |
| Clinical <sup>b</sup>                                       | 1423 | 1.76 (1.18 – 2.62)               | 2.18 (1.47 – 3.23)            | < 0.001 |
| Complete <sup>c</sup>                                       | 1423 | 1.56 (1.02 – 2.37)               | 2.18 (1.43 – 3.33)            | < 0.001 |
| <i>Models with effect modification by mode of delivery:</i> |      |                                  |                               |         |
| Clinical (vaginal delivery) <sup>b</sup>                    | 1423 | 2.11 (1.38 – 3.23)               | 2.23 (1.45 – 3.41)            | 0.023   |
| Clinical (caesarean delivery) <sup>b</sup>                  |      | 0.53 (0.17 – 1.65)               | 1.47 (0.48 – 4.46)            |         |
| Complete (vaginal delivery) <sup>c</sup>                    | 1423 | 1.88 (1.20 – 2.94)               | 2.27 (1.44 – 3.57)            | 0.029   |
| Complete (caesarean delivery) <sup>c</sup>                  |      | 0.45 (0.14 – 1.46)               | 1.33 (0.42 – 4.20)            |         |
| <b>Delivery Room death</b>                                  |      |                                  |                               |         |
| Baseline                                                    | 1484 | 0.12 (0.08 – 0.16)               | 0.07 (0.06 – 0.10)            | < 0.001 |
| Baseline + GA <sup>a</sup>                                  | 1484 | 0.38 (0.25 – 0.58)               | 0.32 (0.22 – 0.48)            | < 0.001 |
| Clinical <sup>b</sup>                                       | 1423 | 0.45 (0.29 – 0.69)               | 0.36 (0.23 – 0.56)            | < 0.001 |
| Complete <sup>c</sup>                                       | 1423 | 0.53 (0.33 – 0.86)               | 0.35 (0.22 – 0.58)            | < 0.001 |
| <i>Models with effect modification by mode of delivery:</i> |      |                                  |                               |         |
| Clinical (vaginal delivery) <sup>b</sup>                    | 1423 | 0.38 (0.24 – 0.60)               | 0.33 (0.20 – 0.52)            | 0.056   |
| Clinical (caesarean delivery) <sup>b</sup>                  |      | 2.48 (0.47 – 12.97)              | 1.04 (0.21 – 5.16)            |         |
| Complete (vaginal delivery) <sup>c</sup>                    | 1423 | 0.44 (0.26 – 0.73)               | 0.31 (0.18 – 0.52)            | 0.033   |
| Complete (caesarean delivery) <sup>c</sup>                  |      | 4.91 (0.63 – 38.35)              | 2.09 (0.28 – 15.47)           |         |

<sup>a</sup> GA: gestational age

<sup>b</sup> The clinical models were additionally adjusted for: mode of delivery, *in utero* transfer, maternal pre-eclampsia and placental abruption.

<sup>c</sup> The complete models were adjusted for the same factors as the clinical models, plus: who the parents were counselled by, whether a decision was made not to perform caesarean section in cases of fetal distress, what choice was expressed for resuscitation, and whether withholding care was discussed.



### Supplementary table 3 — Sensitivity analysis results for mode of delivery

Table S3: Odds ratios of the effect of delivery by caesarean section on the presence of a heart rate greater than 100 at 5 minutes of age or to delivery room death in the population of babies born at 22-26 completed weeks of gestation to women who received a partial or full course of antenatal steroids in England in 2006.

| Model                                                  | N    | OR   | (95% CI)       | P-value |
|--------------------------------------------------------|------|------|----------------|---------|
| <b>Condition at birth</b>                              |      |      |                |         |
| Baseline                                               | 1213 | 2.31 | (1.61 – 3.31)  | <0.001  |
| Baseline + GA <sup>a</sup>                             | 1213 | 1.46 | (0.99 – 2.15)  | <0.001  |
| <i>Models with effect modification by labour type:</i> |      |      |                |         |
| No labour <sup>b</sup>                                 | 1212 | 4.08 | (1.96 – 8.50)  | 0.003   |
| Spont labour <sup>b</sup>                              |      | 0.86 | (0.52 – 1.43)  |         |
| Clinical: no labour <sup>c</sup>                       | 1172 | 8.67 | (3.47 – 21.70) | 0.0001  |
| Clinical: spont labour <sup>c</sup>                    |      | 1.22 | (0.71 – 2.09)  |         |
| Complete: no labour <sup>d</sup>                       | 1172 | 5.55 | (2.13 – 14.47) | 0.016   |
| Complete: spont labour <sup>d</sup>                    |      | 1.03 | (0.60 – 1.79)  |         |
| <b>Delivery Room death</b>                             |      |      |                |         |
| Baseline                                               | 1213 | 0.38 | (0.24 – 0.61)  | <0.001  |
| Baseline + GA <sup>a</sup>                             | 1213 | 0.84 | (0.51 – 1.39)  | <0.001  |
| <i>Models with effect modification by labour type:</i> |      |      |                |         |
| No labour <sup>b</sup>                                 | 1212 | 0.19 | (0.08 – 0.46)  | 0.0002  |
| Spont labour <sup>b</sup>                              |      | 1.47 | (0.76 – 2.82)  |         |
| Clinical: no labour <sup>e</sup>                       | 1178 | 0.05 | (0.02 – 0.17)  | <0.001  |
| Clinical: spont labour <sup>e</sup>                    |      | 0.90 | (0.45 – 1.81)  |         |
| Complete: no labour <sup>f</sup>                       | 1210 | 0.10 | (0.03 – 0.34)  | 0.033   |
| Complete: spont labour <sup>f</sup>                    |      | 1.18 | (0.58 – 2.43)  |         |

<sup>a</sup> GA: gestational age.

<sup>b</sup> Adjusted for gestational age.

<sup>c</sup> Adjusted for: GA, labour type, *in utero* transfer, presentation at delivery, NICU level at birth hospital, maternal pre-eclampsia and placental abruption.

<sup>d</sup> Adjusted for the same factors as the clinical model ('c'), plus: who the parents were counselled by, whether a decision was made not to perform Caesarean section in cases of fetal distress, and what choice was expressed for resuscitation.

<sup>e</sup> Adjusted for: GA, labour type, antenatal steroids, presentation at delivery, maternal pre-eclampsia and placental abruption.

<sup>f</sup> Adjusted for the same factors as the clinical model ('c'), plus: who the parents were counselled by, whether a decision was made not to perform Caesarean section in cases of fetal distress, what choice was expressed for resuscitation, and whether withholding care was discussed.

**Author details**

<sup>1</sup>Institute for Womens' Health, UCL, 74 Huntley Street, WC1E 6AU, London, UK. <sup>2</sup> Homerton Hospital, London, UK. <sup>3</sup> University of Leicester, Leicester, UK. <sup>4</sup> University of Liverpool, Liverpool, UK. <sup>5</sup> The Wolfson Institute, Queen Mary University of London, London, UK.

**References**
