# Supplementary material for: Impact of obstetric interventions on condition at birth in extremely preterm babies: evidence from a national cohort study
Source: Springer Nature journal article supplement (doi:10.1186/s12884-016-1154-y), 2016-12-01
Supplement: MOESM3 [file 11931134]

## RESEARCH

## Additional file 3: STROBE Checklist

Andrei S Morgan<sup>1\*</sup>, Neil Marlow<sup>1</sup>, Elizabeth S Draper<sup>3</sup>, Zarko Alfirevic<sup>4</sup>, Enid M Hennessy<sup>5</sup> and Kate Costeloe<sup>2</sup>

\*Correspondence:

[andrei.morgan@ucl.ac.uk](mailto:andrei.morgan@ucl.ac.uk)

<sup>1</sup>Institute for Womens' Health,  
UCL, 74 Huntley Street, WC1E  
6AU, London, UK

Full list of author information is  
available at the end of the article

## 1 STROBE Statement checklist

The following table contains the STROBE checklist of items to be included in reports of cohort studies alongside a reference to where in the article the information may be found.

### STROBE checklist for “Impact of obstetric interventions on condition at birth in extremely preterm babies: evidence from a national cohort study”

|                                   | Item No        | Recommendation                                                                                                                                                                        | Page (notes)                              |
|-----------------------------------|----------------|---------------------------------------------------------------------------------------------------------------------------------------------------------------------------------------|-------------------------------------------|
| <b>Title and abstract</b>         | 1              | (a) Indicate the study's design with a commonly used term in the title or the abstract                                                                                                | Page 1 (Title)                            |
|                                   |                | (b) Provide in the abstract an informative and balanced summary of what was done and what was found                                                                                   | Page 1                                    |
| <b>Introduction</b>               |                |                                                                                                                                                                                       |                                           |
| Background/rationale <sup>2</sup> |                | Explain the scientific background and rationale for the investigation being reported                                                                                                  | Page 2 (background section)               |
| Objectives                        | 3              | State specific objectives, including any prespecified hypotheses                                                                                                                      | Page 2 (final paragraph of background)    |
| <b>Methods</b>                    |                |                                                                                                                                                                                       |                                           |
| Study design                      | 4              | Present key elements of study design early in the paper                                                                                                                               | Page 2 (methods)                          |
| Setting                           | 5              | Describe the setting, locations, and relevant dates, including periods of recruitment, exposure, follow-up, and data collection                                                       | Page 2 (methods)                          |
| Participants                      | 6              | (a) Give the eligibility criteria, and the sources and methods of selection of participants. Describe methods of follow-up                                                            | Page 2 (methods)                          |
|                                   |                | (b) For matched studies, give matching criteria and number of exposed and unexposed                                                                                                   | N/A                                       |
| Variables                         | 7              | Clearly define all outcomes, exposures, predictors, potential confounders, and effect modifiers. Give diagnostic criteria, if applicable                                              | Page 3 (study variables)                  |
| Data sources/measurement          | 8 <sup>a</sup> | For each variable of interest, give sources of data and details of methods of assessment (measurement). Describe comparability of assessment methods if there is more than one group. | Pages 2 (methods) and 3 (study variables) |

Continued on next page. . .

## Strobe checklist (continued)

|                        | Item No         | Recommendation                                                                                                                                                                                               | Page (notes)                                                                                                                                                                                                  |
|------------------------|-----------------|--------------------------------------------------------------------------------------------------------------------------------------------------------------------------------------------------------------|---------------------------------------------------------------------------------------------------------------------------------------------------------------------------------------------------------------|
| Bias                   | 9               | Describe any efforts to address potential sources of bias                                                                                                                                                    | Page 4 (final paragraph of 'statistical methods')                                                                                                                                                             |
| Study size             | 10              | Explain how the study size was arrived at                                                                                                                                                                    | Pages 2 (methods) and Additional file 1: Figure 1. Additional information relating to this is provided in the other figures (figure 1, page 17, and Additional file 1: Figures 2-4)                           |
| Quantitative variables | 11              | Explain how quantitative variables were handled in the analyses. If applicable, describe which groupings were chosen and why                                                                                 | Page 3 (study variables)                                                                                                                                                                                      |
| Statistical methods    | 12              | (a) Describe all statistical methods, including those used to control for confounding                                                                                                                        | Page 4 (statistical methods)                                                                                                                                                                                  |
|                        |                 | (b) Describe any methods used to examine subgroups and interactions                                                                                                                                          | Page 4 (statistical methods, second paragraph)                                                                                                                                                                |
|                        |                 | (c) Explain how missing data were addressed                                                                                                                                                                  | Page 5 (third paragraph)                                                                                                                                                                                      |
|                        |                 | (d) If applicable, explain how loss to follow-up was addressed                                                                                                                                               | N/A                                                                                                                                                                                                           |
|                        |                 | (e) Describe any sensitivity analyses                                                                                                                                                                        | Page 4 (third paragraph)                                                                                                                                                                                      |
| <b>Results</b>         |                 |                                                                                                                                                                                                              |                                                                                                                                                                                                               |
| Participants           | 13 <sup>a</sup> | (a) Report numbers of individuals at each stage of study—eg numbers potentially eligible, examined for eligibility, confirmed eligible, included in the study, completing follow-up, and analysed            | Page 4 (Results: "population" section) and Additional file 1: Figure 1. Additional information relating to this is provided in the other figures (figure 1, page 15, and Additional file 1: figures 2-4)      |
|                        |                 | (b) Give reasons for non-participation at each stage                                                                                                                                                         | Additional file 1: Figure 1                                                                                                                                                                                   |
|                        |                 | (c) Consider use of a flow diagram                                                                                                                                                                           | Figure 1 (pages 17) and Additional file 1: figures 1-4                                                                                                                                                        |
| Descriptive data       | 14 <sup>a</sup> | (a) Give characteristics of study participants (eg demographic, clinical, social) and information on exposures and potential confounders                                                                     | Pages 4 (Results: "population" section), 6 (table 1) and Additional file 2: Table 1                                                                                                                           |
|                        |                 | (b) Indicate number of participants with missing data for each variable of interest                                                                                                                          | Pages 4 (Results: "population" section), 6 (table 1) and Additional file 2: Table 1                                                                                                                           |
|                        |                 | (c) Summarise follow-up time (eg, average and total amount)                                                                                                                                                  | N/A                                                                                                                                                                                                           |
| Outcome data           | 15 <sup>a</sup> | Report numbers of outcome events or summary measures over time                                                                                                                                               | Page 5 (Results: "population" section, third paragraph) and page 6 (table 1)                                                                                                                                  |
| Main results           | 16              | (a) Give unadjusted estimates and, if applicable, confounder-adjusted estimates and their precision (eg, 95% confidence interval). Make clear which confounders were adjusted for and why they were included | Pages 4-11 (Entire "results" section. Unadjusted results are presented first, with confounder adjusted estimates listed under each of the main exposures: antenatal steroids, tocolysis and mode of delivery) |
|                        |                 | (b) Report category boundaries when continuous variables were categorized                                                                                                                                    | Additional file 2: Table 1                                                                                                                                                                                    |
|                        |                 | (c) If relevant, consider translating estimates of relative risk into absolute risk for a meaningful time period                                                                                             | N/A                                                                                                                                                                                                           |

Continued on next page...

**Strobe checklist (continued)**

|                          | <b>Item No</b> | <b>Recommendation</b>                                                                                                                                                      | <b>Page (notes)</b>                                                                 |
|--------------------------|----------------|----------------------------------------------------------------------------------------------------------------------------------------------------------------------------|-------------------------------------------------------------------------------------|
| Other analyses           | 17             | Report other analyses done—eg analyses of subgroups and interactions, and sensitivity analyses                                                                             | Pages 8-11 (sensitivity analyses, discussed under each of the respective exposures) |
| <b>Discussion</b>        |                |                                                                                                                                                                            |                                                                                     |
| Key results              | 18             | Summarise key results with reference to study objectives                                                                                                                   | Page 1 (principal findings)                                                         |
| Limitations              | 19             | Discuss limitations of the study, taking into account sources of potential bias or imprecision. Discuss both direction and magnitude of any potential bias                 | Pages 11-13 (Strengths and limitations of this study)                               |
| Interpretation           | 20             | Give a cautious overall interpretation of results considering objectives, limitations, multiplicity of analyses, results from similar studies, and other relevant evidence | Pages 13-14 (Study findings in context)                                             |
| Generalisability         | 21             | Discuss the generalisability (external validity) of the study results                                                                                                      | Pages 13-14 (Study findings in context)                                             |
| <b>Other information</b> |                |                                                                                                                                                                            |                                                                                     |
| Funding                  | 22             | Give the source of funding and the role of the funders for the present study and, if applicable, for the original study on which the present article is based              | Page 14 (Funding)                                                                   |

<sup>a</sup> Give information separately for exposed and unexposed groups.

**Note:**

An Explanation and Elaboration article discusses each checklist item and gives methodological background and published examples of transparent reporting. The STROBE checklist is best used in conjunction with this article (freely available on the Web sites of PLoS Medicine at <http://www.plosmedicine.org/>, Annals of Internal Medicine at <http://www.annals.org/>, and Epidemiology at <http://www.epidem.com/>). Information on the STROBE Initiative is available at <http://www.strobe-statement.org>.

**Author details**

<sup>1</sup>Institute for Womens' Health, UCL, 74 Huntley Street, WC1E 6AU, London, UK. <sup>2</sup> Homerton Hospital, London, UK. <sup>3</sup> University of Leicester, Leicester, UK. <sup>4</sup> University of Liverpool, Liverpool, UK. <sup>5</sup> The Wolfson Institute, Queen Mary University of London, London, UK.

**References**
